# Supplementary figures and images for: Development of a solid-compatible continuous flow reactor for the paraformaldehyde slurry mediated α-hydroxymethylation of methyl vinyl ketone
Source: Royal Society of Chemistry journal article supplement (doi:10.1039/d4re00220b), 2024-01-01

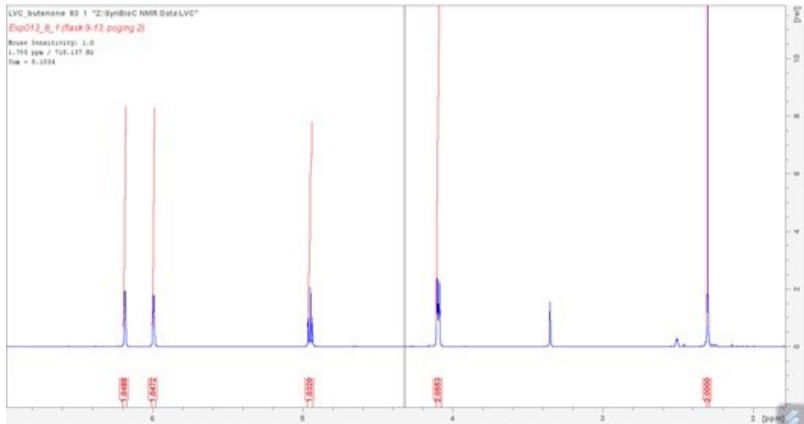

Supplement: d4re00220b2.pdf [file d4re00220b2.pdf]

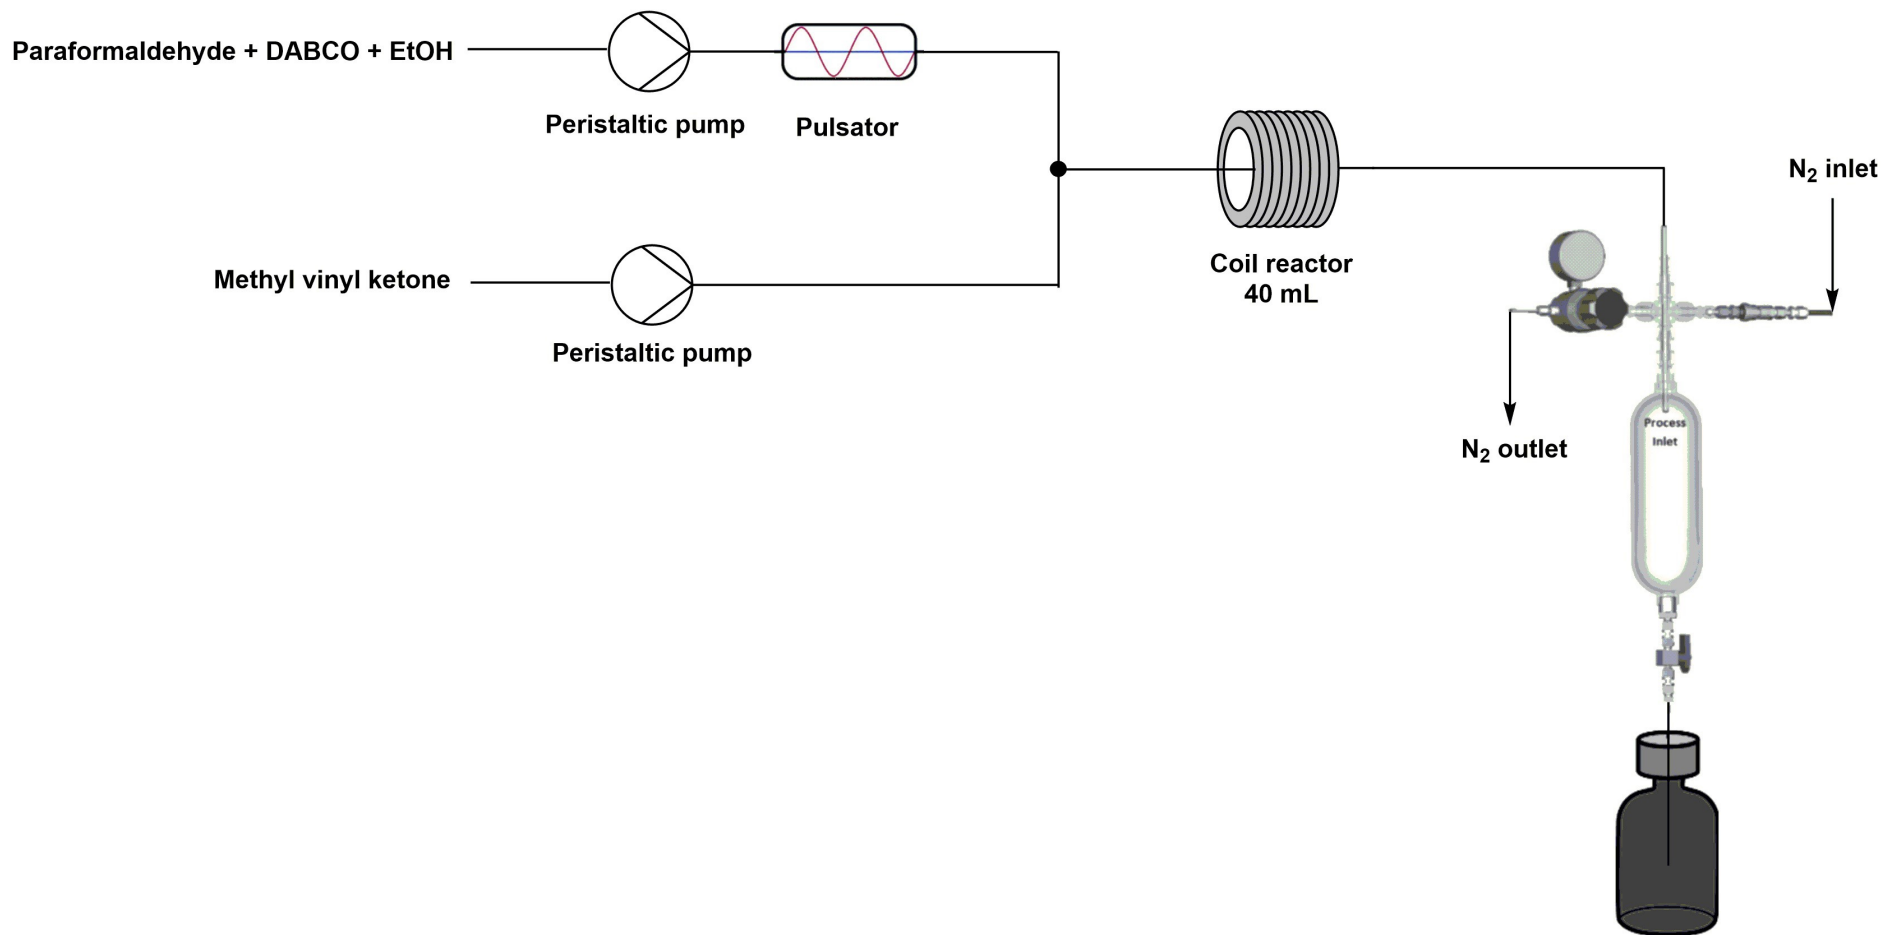

Supplement: d4re00220b3.pdf [file d4re00220b3.pdf]

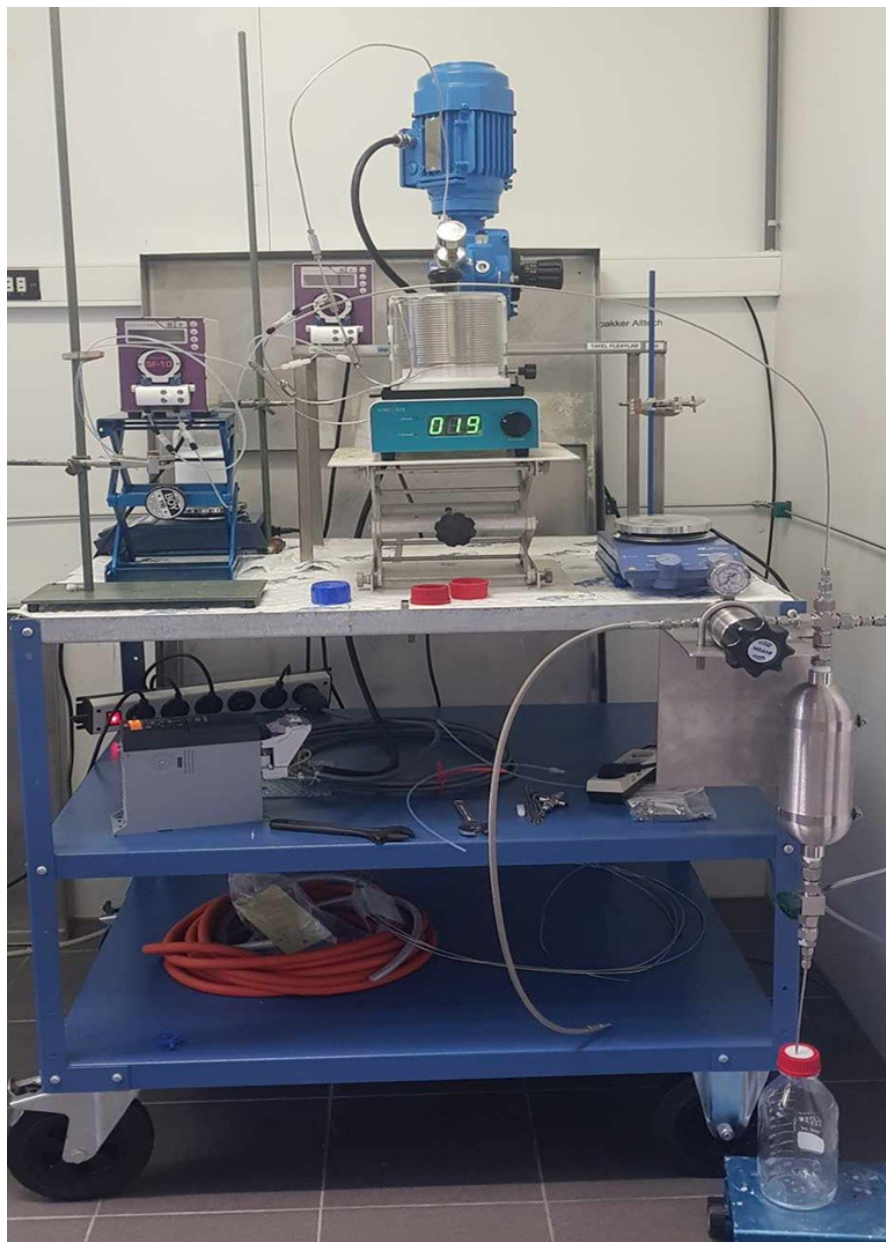

Supplement: d4re00220b4.pdf [file d4re00220b4.pdf]

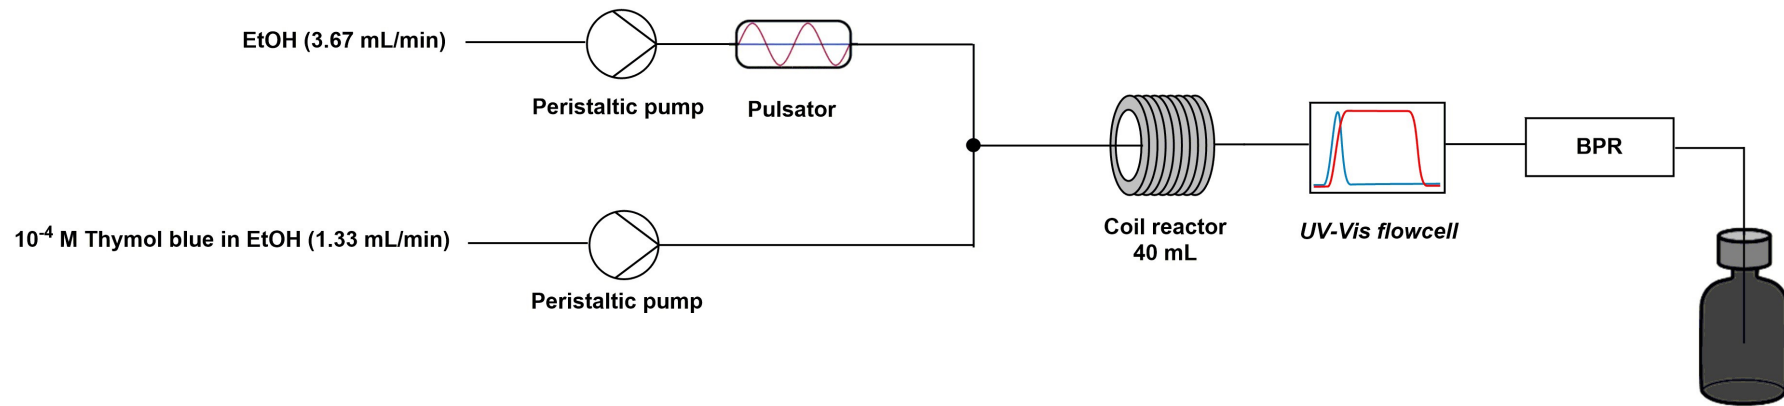

Supplement: d4re00220b5.pdf [file d4re00220b5.pdf]

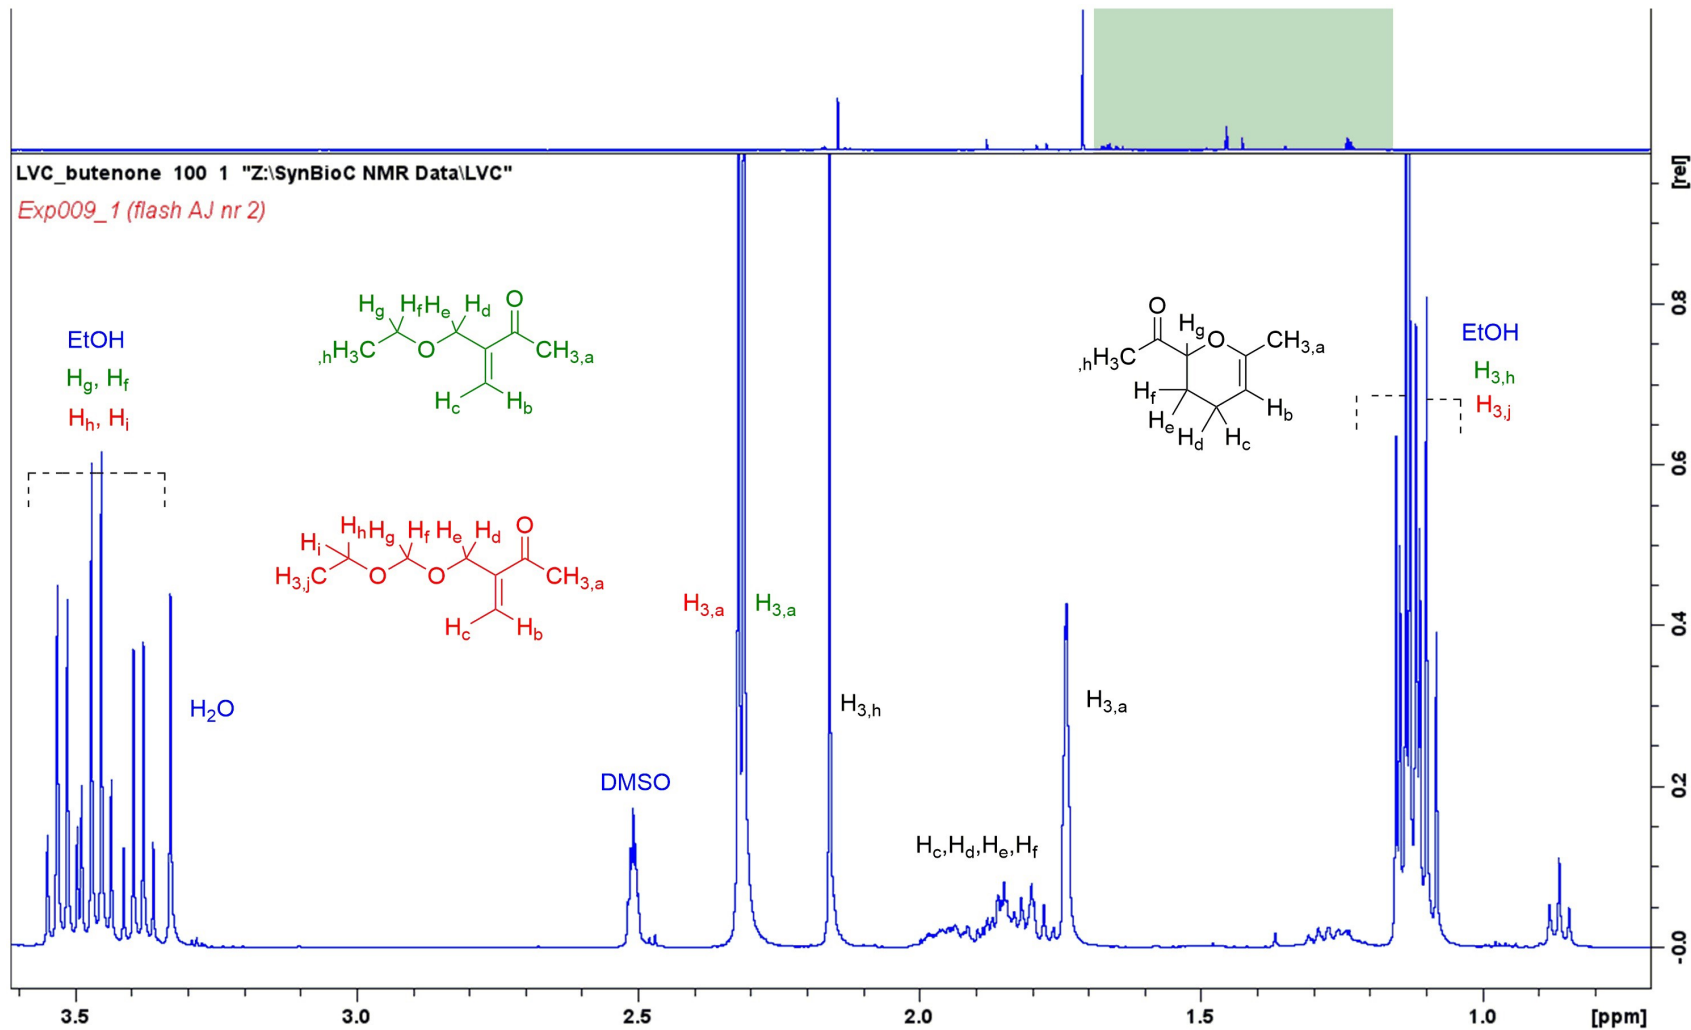

Supplement: d4re00220b6.pdf [file d4re00220b6.pdf]
